# Supplementary material for: lncRNA MIR210HG promotes the progression of endometrial cancer by sponging miR-337-3p/137 via the HMGA2-TGF-β/Wnt pathway
Source: PubMed Central journal article supplement — Mol Ther Nucleic Acids. 2021 Apr 16;24:905–22. doi: 10.1016/j.omtn.2021.04.011 (PMC8141672; doi:10.1016/j.omtn.2021.04.011), 2021-04-16
Supplement: mmc1.pdf [file mmc1.pdf]

OMTN, Volume 24

## Supplemental information

**lncRNA MIR210HG promotes the progression  
of endometrial cancer by sponging miR-337-3p/137  
via the HMGA2-TGF- $\beta$ /Wnt pathway**

**Jian Ma, Fan-Fei Kong, Di Yang, Hui Yang, Cuicui Wang, Rong Cong, and Xiao-Xin Ma**

### Supplementary Table S1

Table S1: qRT-PCR was used to detected the expression of MIR210HG mRNA expression and analyzed the clinicopathologic characteristics of endometrial cancer patients.

| Clinical pathological parameters |                           | N = 40 | MIR210HG<br>Mean $\pm$ SEM | <i>P</i> |
|----------------------------------|---------------------------|--------|----------------------------|----------|
| Age                              | < 60                      | 28     | 4.016 $\pm$ 1.031          | 0.7771   |
|                                  | $\geq$ 60                 | 12     | 3.448 $\pm$ 1.872          |          |
| Clinical stage                   | I + II                    | 28     | 1.607 $\pm$ 0.282          | 0.0001   |
|                                  | III + IV                  | 12     | 9.068 $\pm$ 2.371          |          |
| Differentiation                  | High                      | 16     | 2.049 $\pm$ 0.432          | 0.1043   |
|                                  | Middle                    | 14     | 5.032 $\pm$ 1.839          |          |
|                                  | Low                       | 10     | 5.059 $\pm$ 2.411          |          |
| Infiltration degree              | < 1/2 Muscle layerer      | 33     | 3.502 $\pm$ 0.906          | 0.4151   |
|                                  | $\geq$ 1/2 Muscle layerer | 7      | 5.466 $\pm$ 3.007          |          |
| Lymphnode metastasis             | Negative                  | 33     | 2.512 $\pm$ 0.653          | 0.0007   |
|                                  | Positive                  | 7      | 10.13 $\pm$ 3.393          |          |
| Distal metastasis                | Negative                  | 38     | 3.922 $\pm$ 0.949          | 0.7163   |
|                                  | Positive                  | 2      | 2.389 $\pm$ 0.354          |          |

Note:

*P* = 0.1043, High differentiation *vs.* Middle differentiation;

*P* = 0.1380, High differentiation *vs.* Low differentiation.

Note:

FIGO stage: I+II vs. III+IV;

Differentiation:  $P > 0.9999$ , High differentiation vs. Middle differentiation;  $P = 0.0154$ , High differentiation vs. Low differentiation

### Supplementary Table S2

Table S2: *In situ hybridization analysis* was used to detect the expression of MIR210HG in normal endometrial tissue and endometrial carcinoma tissue, and analyzed the relationship between the expression of MIR210HG and clinicopathological parameters.

| Clinical pathological parameters | N  | MIR210HG |     | P       |
|----------------------------------|----|----------|-----|---------|
|                                  |    | (-)      | (+) |         |
| Age                              |    |          |     | 0.0292  |
| < 60                             | 54 | 14       | 40  |         |
| ≥ 60                             | 24 | 1        | 23  |         |
| FIGO stage                       |    |          |     | 0.0439  |
| I                                | 17 | 5        | 12  |         |
| II                               | 16 | 5        | 11  |         |
| III                              | 34 | 4        | 30  |         |
| IV                               | 11 | 1        | 10  |         |
| Differentiation                  |    |          |     |         |
| High                             | 27 | 7        | 20  |         |
| Middle                           | 31 | 8        | 23  | >0.9999 |
| Low                              | 20 | 0        | 20  | 0.0154  |
| Muscular invasion                |    |          |     | 0.0010  |
| < 1/2                            | 43 | 14       | 29  |         |
| ≥ 1/2                            | 35 | 1        | 34  |         |
| Lymphnode metastasis             |    |          |     | 0.0700  |
| Negative                         | 50 | 13       | 37  |         |
| Positive                         | 28 | 2        | 26  |         |

Note:

FIGO stage: I+II vs. III+IV;

Differentiation:  $P > 0.9999$ , High differentiation vs. Middle differentiation;  $P = 0.0154$ , High differentiation vs. Low differentiation

Supplementary Table S3

Table S3: Association between miR-337-3p mRNA expression and endometrial cancer patients clinicopathologic characteristics

| Clinical pathological parameters |                           | N = 40 | miR-337-3p<br>Mean $\pm$ SEM | <i>P</i> |
|----------------------------------|---------------------------|--------|------------------------------|----------|
| Age                              | < 60                      | 28     | 0.151 $\pm$ 0.029            | 0.7155   |
|                                  | $\geq$ 60                 | 12     | 0.168 $\pm$ 0.033            |          |
| Clinical stage                   | I + II                    | 28     | 0.207 $\pm$ 0.026            | 0.0002   |
|                                  | III + IV                  | 12     | 0.037 $\pm$ 0.005            |          |
| Differentiation                  | High                      | 16     | 0.204 $\pm$ 0.043            | 0.1104   |
|                                  | Middle                    | 14     | 0.116 $\pm$ 0.030            |          |
|                                  | Low                       | 10     | 0.136 $\pm$ 0.035            |          |
| Infiltration degree              | < 1/2 Muscle layerer      | 33     | 0.167 $\pm$ 0.025            | 0.3023   |
|                                  | $\geq$ 1/2 Muscle layerer | 7      | 0.106 $\pm$ 0.040            |          |
| Lymphnode metastasis             | Negative                  | 33     | 0.180 $\pm$ 0.025            | 0.0145   |
|                                  | Positive                  | 7      | 0.041 $\pm$ 0.008            |          |
| Distal metastasis                | Negative                  | 38     | 0.163 $\pm$ 0.023            | 0.1695   |
|                                  | Positive                  | 2      | 0.023 $\pm$ 0.001            |          |

Note:

*P* = 0.1104, High differentiation *vs.* Middle differentiation;

*P* = 0.2713, High differentiation *vs.* Low differentiation.

Supplementary Table S4

Table S4: Association between miR-137 mRNA expression and endometrial cancer patients clinicopathologic characteristics

| Clinical pathological parameters |                           | N = 40 | miR-137<br>Mean $\pm$ SEM | <i>P</i> |
|----------------------------------|---------------------------|--------|---------------------------|----------|
| Age                              | < 60                      | 28     | 0.044 $\pm$ 0.008         | 0.3238   |
|                                  | $\geq$ 60                 | 12     | 0.064 $\pm$ 0.025         |          |
| Clinical stage                   | I + II                    | 28     | 0.066 $\pm$ 0.012         | 0.0060   |
|                                  | III + IV                  | 12     | 0.013 $\pm$ 0.003         |          |
| Differentiation                  | High                      | 16     | 0.070 $\pm$ 0.020         | 0.1500   |
|                                  | Middle                    | 14     | 0.036 $\pm$ 0.008         |          |
|                                  | Low                       | 10     | 0.038 $\pm$ 0.009         |          |
| Infiltration degree              | < 1/2 Muscle layerer      | 33     | 0.051 $\pm$ 0.011         | 0.7325   |
|                                  | $\geq$ 1/2 Muscle layerer | 7      | 0.043 $\pm$ 0.014         |          |
| Lymphnode metastasis             | Negative                  | 33     | 0.058 $\pm$ 0.011         | 0.0513   |
|                                  | Positive                  | 7      | 0.011 $\pm$ 0.005         |          |
| Distal metastasis                | Negative                  | 38     | 0.051 $\pm$ 0.009         | 0.5654   |
|                                  | Positive                  | 2      | 0.027 $\pm$ 0.004         |          |

Note:

*P* = 0.1500, High differentiation *vs.* Middle differentiation;

*P* = 0.8575, High differentiation *vs.* Low differentiation.

Supplementary Table S5

Table S5: The sh-RNA cloned and agomir and antagomir sequences.

| Name                      | Sequence                                                                         |
|---------------------------|----------------------------------------------------------------------------------|
| LV3-MIR210HG –<br>RNAI-1  | 5’-<br>CCCACUUGGCCUAUGCAUUTT-3’                                                  |
| LV3-MIR210HG –<br>RNAI-2  | 5’-<br>GAAAUAAACCAAGCCGAGUUTT -3’                                                |
| LV3-MIR210HG –<br>RNAI-3  | 5’-<br>CCAUGGAACAGCUUUGAAUTT-3’                                                  |
| LV3-NC                    | 5’-<br>TTCTCCGAACGTGTCACGT-3’                                                    |
| miR-NC                    | Sense: 5’-UUCUCCGAACGUGUCACGUTT-3’<br>Antisense: 5’-ACGUGACACGUUCGGAGAATT-3’     |
| Agomir-337-3p             | Sense: 5’-CUCCUAUAUGAUGCCUUUCUUC -3’<br>Antisense: 5’-AGAAAGGCAUCAUAUAGGAGUU -3’ |
| Antagomir-337-3p          | Sense: 5’-GAAGAAAGGCAUVAUAUAGGAG -3’                                             |
| Agomir-137                | Sense: 5’-UUAUUGCUUAAGAAUACGCGUAG-3’<br>Antisense: 5’-AAUAACGAAUUCUUAUGCGCAUC-3’ |
| Antagomir-137             | Sense: 5’-UCACCAUUGCUAAAGUGCAAUU-3’                                              |
| HMGA2-RNAi (4487-<br>1)-a | 5’-<br>GATCCCCCAAGAGGCAGACCTAGGAAACTCGAG<br>TTTCCTAGGTCTGCCTCTTGGTTTTTGGAT-3’    |
| HMGA2-RNAi (4487-<br>1)-b | 5’-<br>AGCTATCCAAAAACCAAGAGGCAGACCTAGGAAA<br>CTCGAGTTTCCTAGGTCTGCCTCTTGGGG-3’    |

Supplementary Table S6

Table S6: Primer sequences for qRT-PCR and *in situ* hybridization.

| Name             | Sequence                                                     |
|------------------|--------------------------------------------------------------|
| MIR210HG         | F: GCAGGCACAGGTGTGGTCATATC<br>R: AGGCAGGCTCAGCAGACAGG        |
| has-miR-337-3p   | F: CTCCTATATGATGCCTTTCTTC                                    |
| has-miR-137      | F: TTATTGCTTAAGAATACGCGTAG                                   |
| GAPDH            | F: GCACCGTCAAGGCTGAGAAC<br>R: TGGTGAAGACGCCAGTGGA            |
| U6               | F: CGGGTTTGTGTTTGCATTTCT<br>R: AGTCCCAGCATGAACAGCTT          |
| MIR210HG probe-1 | 5' – AGCTA GGCAT GGTGG TGGC ACCTG TAATC<br>CCAGC TACTT – 3'  |
| MIR210HG probe-2 | 5' – CACTT GGCCT ATGCA TTCCA GGCTC CATCC<br>CATGT GACTC – 3' |
| MIR210HG probe-3 | 5' – AGCCT CCTGC TGCTG CCTGG CTTCC CTGCA<br>TTCCC TGTTC – 3' |
| HMGA1P1          | F: ACGGCTCCAAGAAGGCTCTCC<br>R: GCTCCGCTTCTCAGTGCCATC         |
| HMGA2            | F: CTCAAAAGAAAGCAGAAGCCACTG<br>R: TGAGCAGGCTTCTTCTGAACAAC    |



Supplementary Table S7

Table S7: Primary antibodies used for the detection of protein expression

| Name             | Manufacturer                                   | Dilution ratio:<br>Western blotting,<br>Immunohistochemistry |
|------------------|------------------------------------------------|--------------------------------------------------------------|
| HMGA2            | Abcam, Cambridge, UK                           | 1:1000, 1:400                                                |
| E-cadherin       | Cell Signaling<br>Technology, Inc.,<br>Danvers | 1:1000                                                       |
| TGF- $\beta$ RII | Abcam, Cambridge, UK                           | 1:1000                                                       |
| $\beta$ -catenin | Cell Signaling<br>Technology, Inc.,<br>Danvers | 1:500                                                        |
| SMAD3            | Abcam, Cambridge, UK                           | 1:1000                                                       |
| p-SMAD3          | Abcam, Cambridge, UK                           | 1:500                                                        |
| Snail            | Proteintech, Hangzhou,<br>China                | 1:200                                                        |
| Ki-67            | Santa Cruz, CA                                 | 1:200, 1:400                                                 |
| Ago2             | Abcam, Cambridge, UK                           | 1:200                                                        |
| GAPDH            | Proteintech, Hangzhou,<br>China                | 1:5000                                                       |
| p-GSK-3 $\beta$  | Abcam, Cambridge, UK                           | 1:1000                                                       |
| c-myc            | Proteintech, Hangzhou,<br>China                | 1:500                                                        |

Supplementary Figure S1

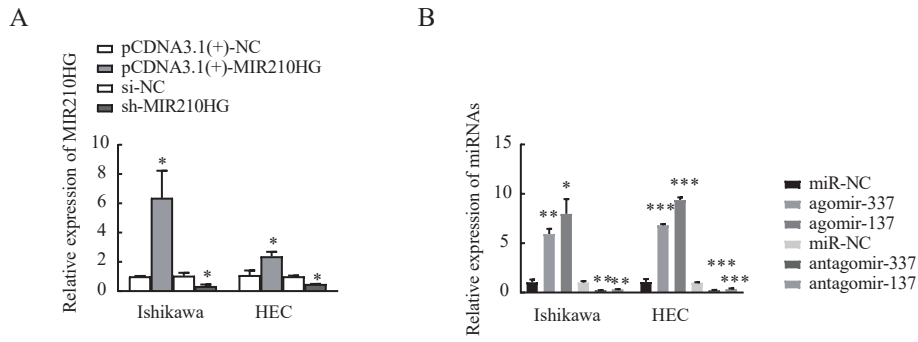

(A) qRT-PCR was used to determine the transfection efficiency of MIR210HG. (B) qRT-PCR was used to determine the transfection efficiency of the miRNAs. Data are presented as the mean  $\pm$  SEM (n = 3 per group). \*P < 0.05, \*\* P < 0.01, \*\*\* P < 0.001.

Supplementary Figure S2

A

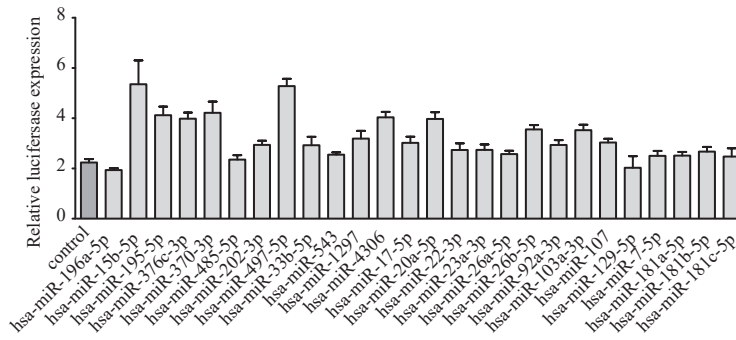

B

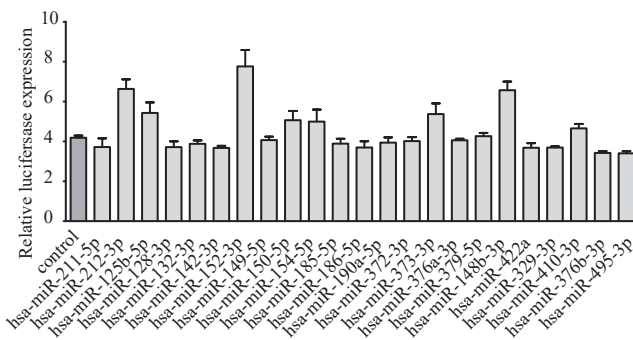

C

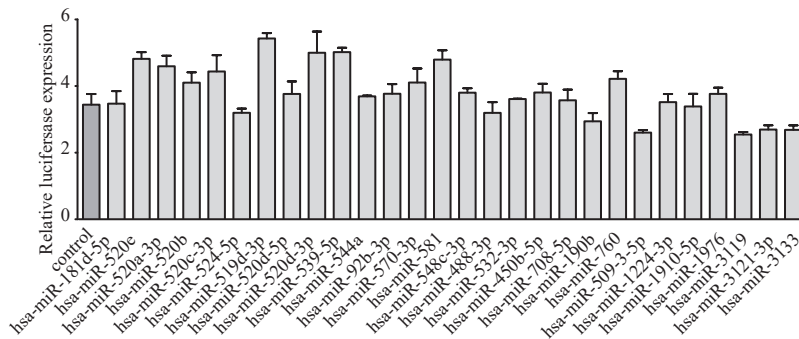

D

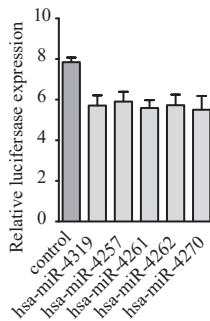

E

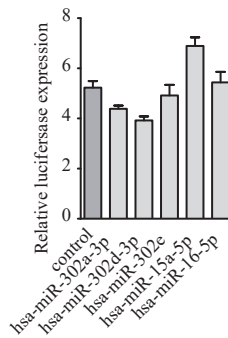

(A) and (E). Luciferase reporter assay using HEK293T cells co-transfected with HMGA2-WT and the indicated miRNA. Data are presented as the mean  $\pm$  SEM (n = 3 per group). \*P < 0.05, \*\* P < 0.01, \*\*\* P < 0.001.

Supplementary Figure S3

A

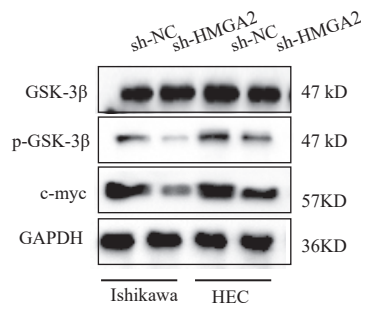

(A) Western blot analysis of the expression of GSK-3β, p-GSK-3β<sup>ser-9</sup>, and c-myc proteins in response to HMGA2 in Ishikawa and HEC-1A cell lines.

Supplementary Figure S4

A

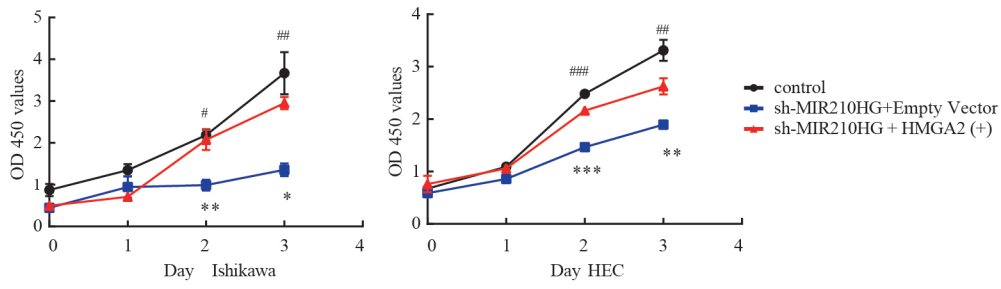

B

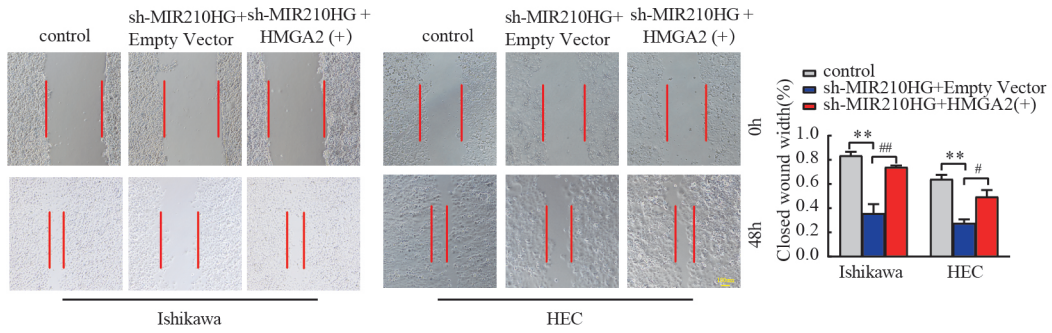

C

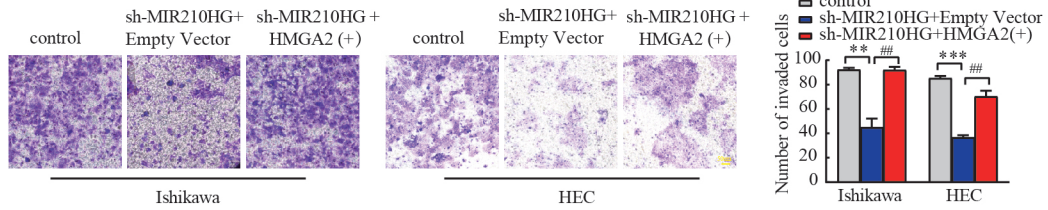

D

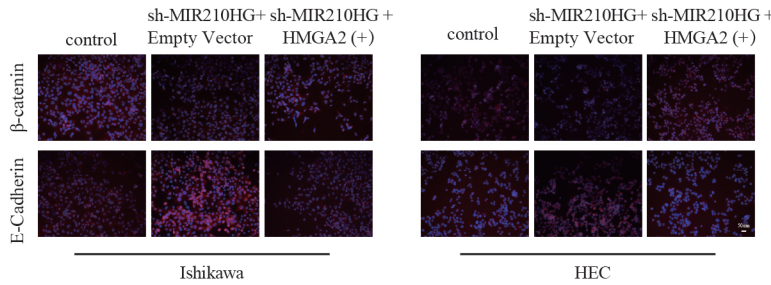

(A) CCK-8 assays to evaluate proliferation in Ishikawa and HEC-1A cell lines. (B) Wound healing assays to investigate the migratory ability of the cells. (C) Transwell assays to determine quantities of invading cells. (D)  $\beta$ -catenin and E-cadherin were analyzed using immunofluorescence staining in Ishikawa and HEC-1A, respectively. Representative images and statistical plots are presented. Data are presented as the mean  $\pm$  SEM, (n = 3). \*P < 0.05, \*\*P < 0.01, \*\*\*P < 0.001 vs. control, #P < 0.05, ##P < 0.01, ###P < 0.001 vs. sh-MIR210HG

Supplementary Figure S5

A

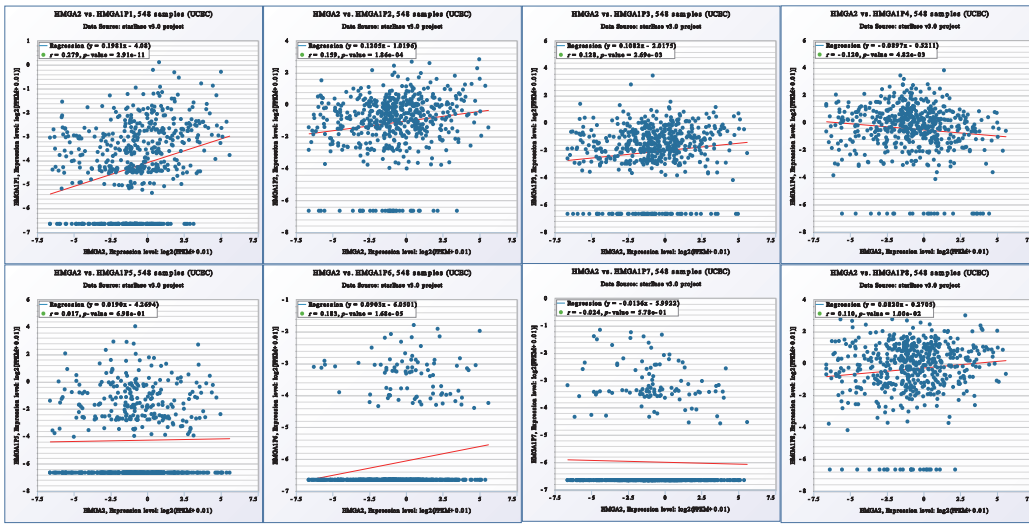

B

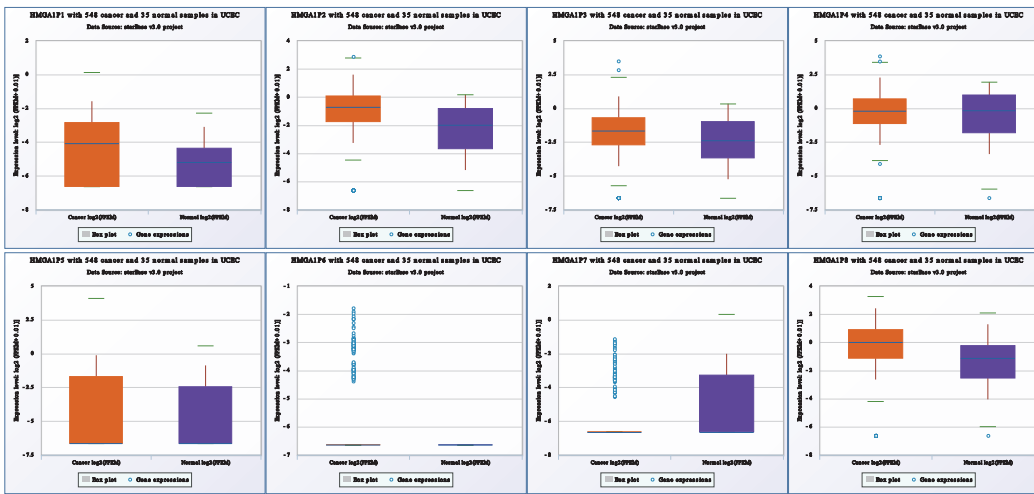

C

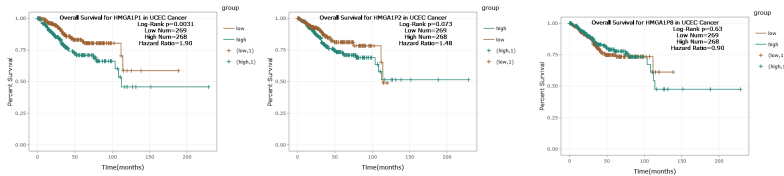

D

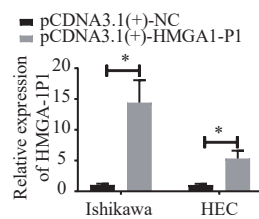

E

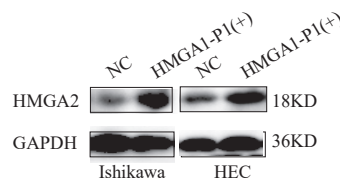

(A) Correlation between the levels of HMGGA2 and HMGGA1 pseudogenes in endometrial cancer (TCGA cohort).

(B) HMGGA1 pseudogenes mRNA expression in endometrial cancer and normal tissue (TCGA cohort).

(C) Kaplan-Meier survival curve for HMGGA1-P1, HMGGA1-P2, HMGGA1-P8 in endometrial cancer (TCGA cohort).

(D) qRT-PCR was used to determine the transfection efficiency of HMGGA1-P1. Data are presented as the mean  $\pm$  SEM (n = 3 per group). \*P < 0.05, \*\* P < 0.01, \*\*\* P < 0.001.

(E) Western blotting assay was performed to analyze the expression of HMGGA2.
